# Supplementary material for: The crystalline state of rubrene materials: intermolecular recognition, isomorphism, polymorphism, and periodic bond-chain analysis of morphologies
Source: Royal Society of Chemistry journal article supplement (doi:10.1039/d2nj00861k), 2022-01-01
Supplement: d2nj00861k1.pdf [file d2nj00861k1.pdf]

## Electronic Supplementary Information (ESI) for New Journal of Chemistry

### **The crystalline state of rubrene materials: intermolecular recognition, isomorphism, polymorphism, and periodic bond-chain analysis of morphologies**

Massimo Moret,<sup>a</sup> and Angelo Gavezzotti<sup>b</sup>

<sup>a</sup>Department of Materials Science, University of Milano - Bicocca (Italy)

E-mail [massimo.moret@unimib.it](mailto:massimo.moret@unimib.it)

<sup>b</sup>Department of Chemistry, University of Milano (retired) (Italy)

E-mail [angelo.gavezzotti@unimi.it](mailto:angelo.gavezzotti@unimi.it)

## Appendix: crystallographic terminology

Throughout the article, the following notations/terms are extensively used:

**[uvw]** crystallographic direction. Any direction in a Bravais lattice is identified by a set of  $N$  indices ( $N$  dimensionality of the space), written in square brackets, called the direction indices. In three-dimensional space, the direction passing through the origin and the lattice nodes  $nu, nv, nw$  ( $n$  integer) has direction indices  $[uvw]$ . The indices  $[-u, -v, -w]$  identify the same direction as  $[uvw]$  observed from the opposite side.

**<uvw>** set of symmetry related crystallographic directions according to space group symmetry

**(hkl)** crystallographic plane identified by its Miller indices

**{hkl}** set of symmetry related crystallographic planes (form) according to space group symmetry

**isomorphous crystals:** two crystals are said to be isomorphous if (a) both have the same space group and unit-cell dimensions and (b) the types and the positions of atoms in both are the same except for a replacement of one or more atoms in one structure with different types of atoms in the other (diadochy), such as heavy atoms, or the presence of one or more additional atoms in one of them (*isomorphous addition*). Isomorphous crystals can form *solid solutions*

**isostructural crystals:** Two crystals are said to be *isostructural* if they have the same structure, but not necessarily the same cell dimensions nor the same chemical composition, and with a 'comparable' variability in the atomic coordinates to that of the cell dimensions and chemical composition. One also speaks of *isostructural series*. The term isotypic is synonymous with isostructural.

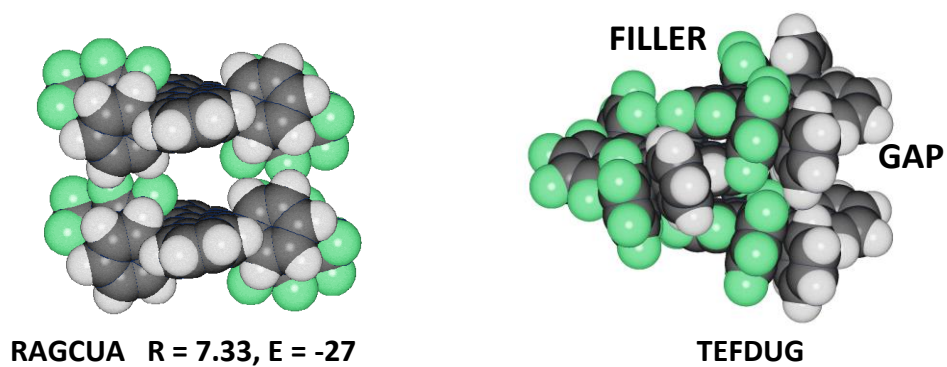

**Figure S1.** RAGCUA, short distance coupling with low stabilization due to parallel tetracene cores without offset. TEFDUG, close packing is restored by the insertion of another filler in the gap. These structures are outliers in the top left part of Figure 2b. Fluorine is green.

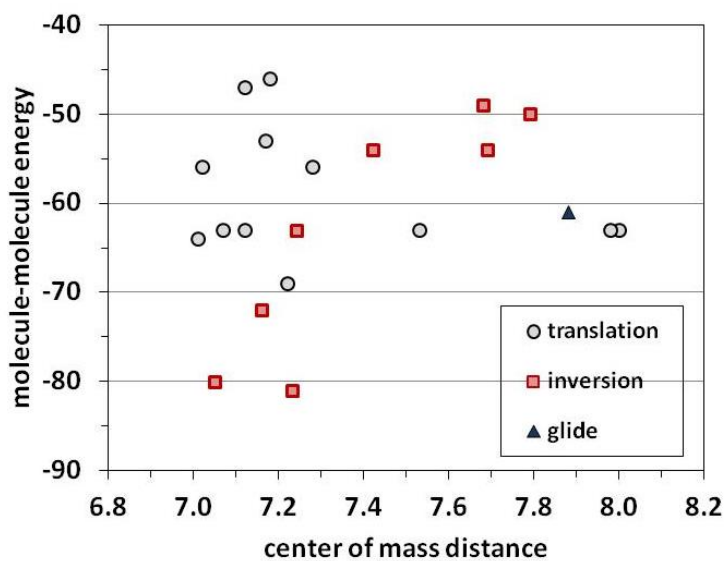

**Figure S2.** Molecule-Molecule energy (kJ/mol) vs. center of mass distance for the subset of slipped-cofacial pairings out of Figure 2b. No correlation

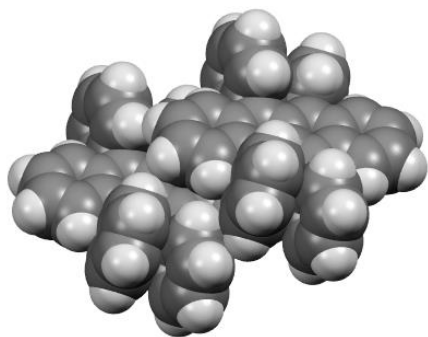

QQCIG05

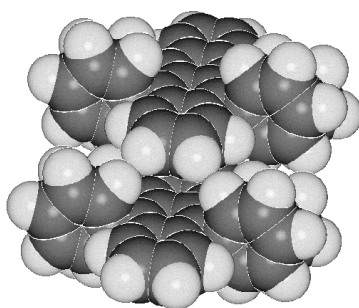

QQCIG14

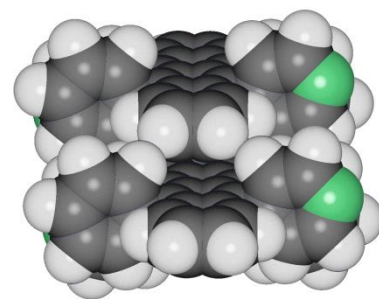

VICHAT

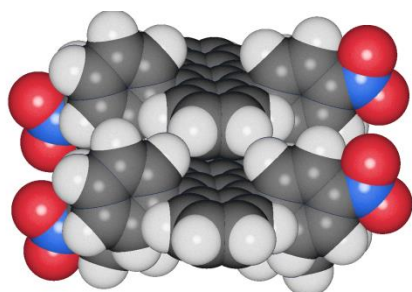

CIYNAB

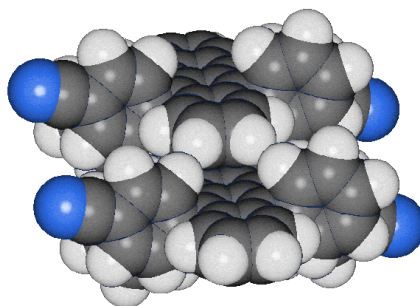

CIYXUF

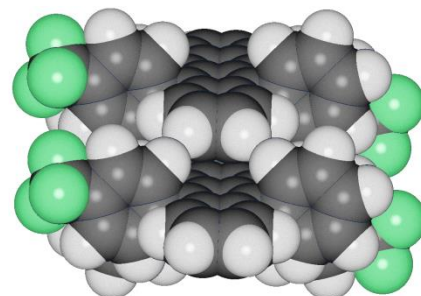

CIYAM

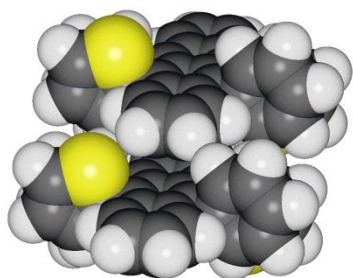

PIXPUJ

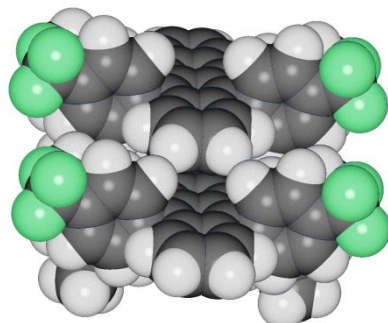

MIVDOM

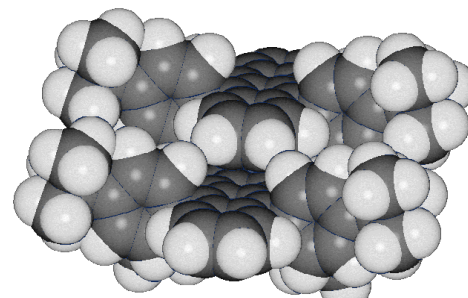

PIFHIW

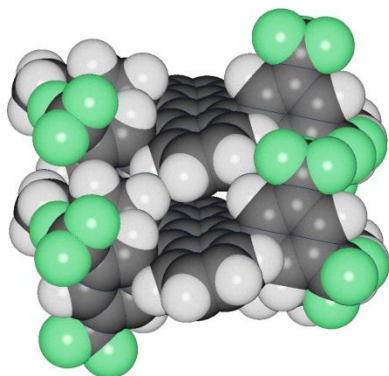

RAGCEK

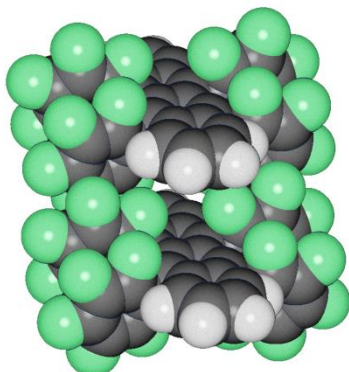

RAGDIP

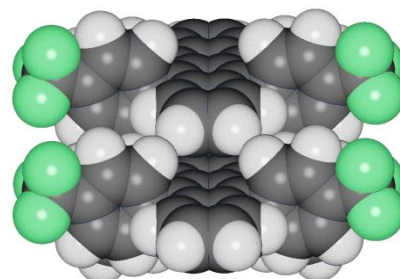

MIVDUS

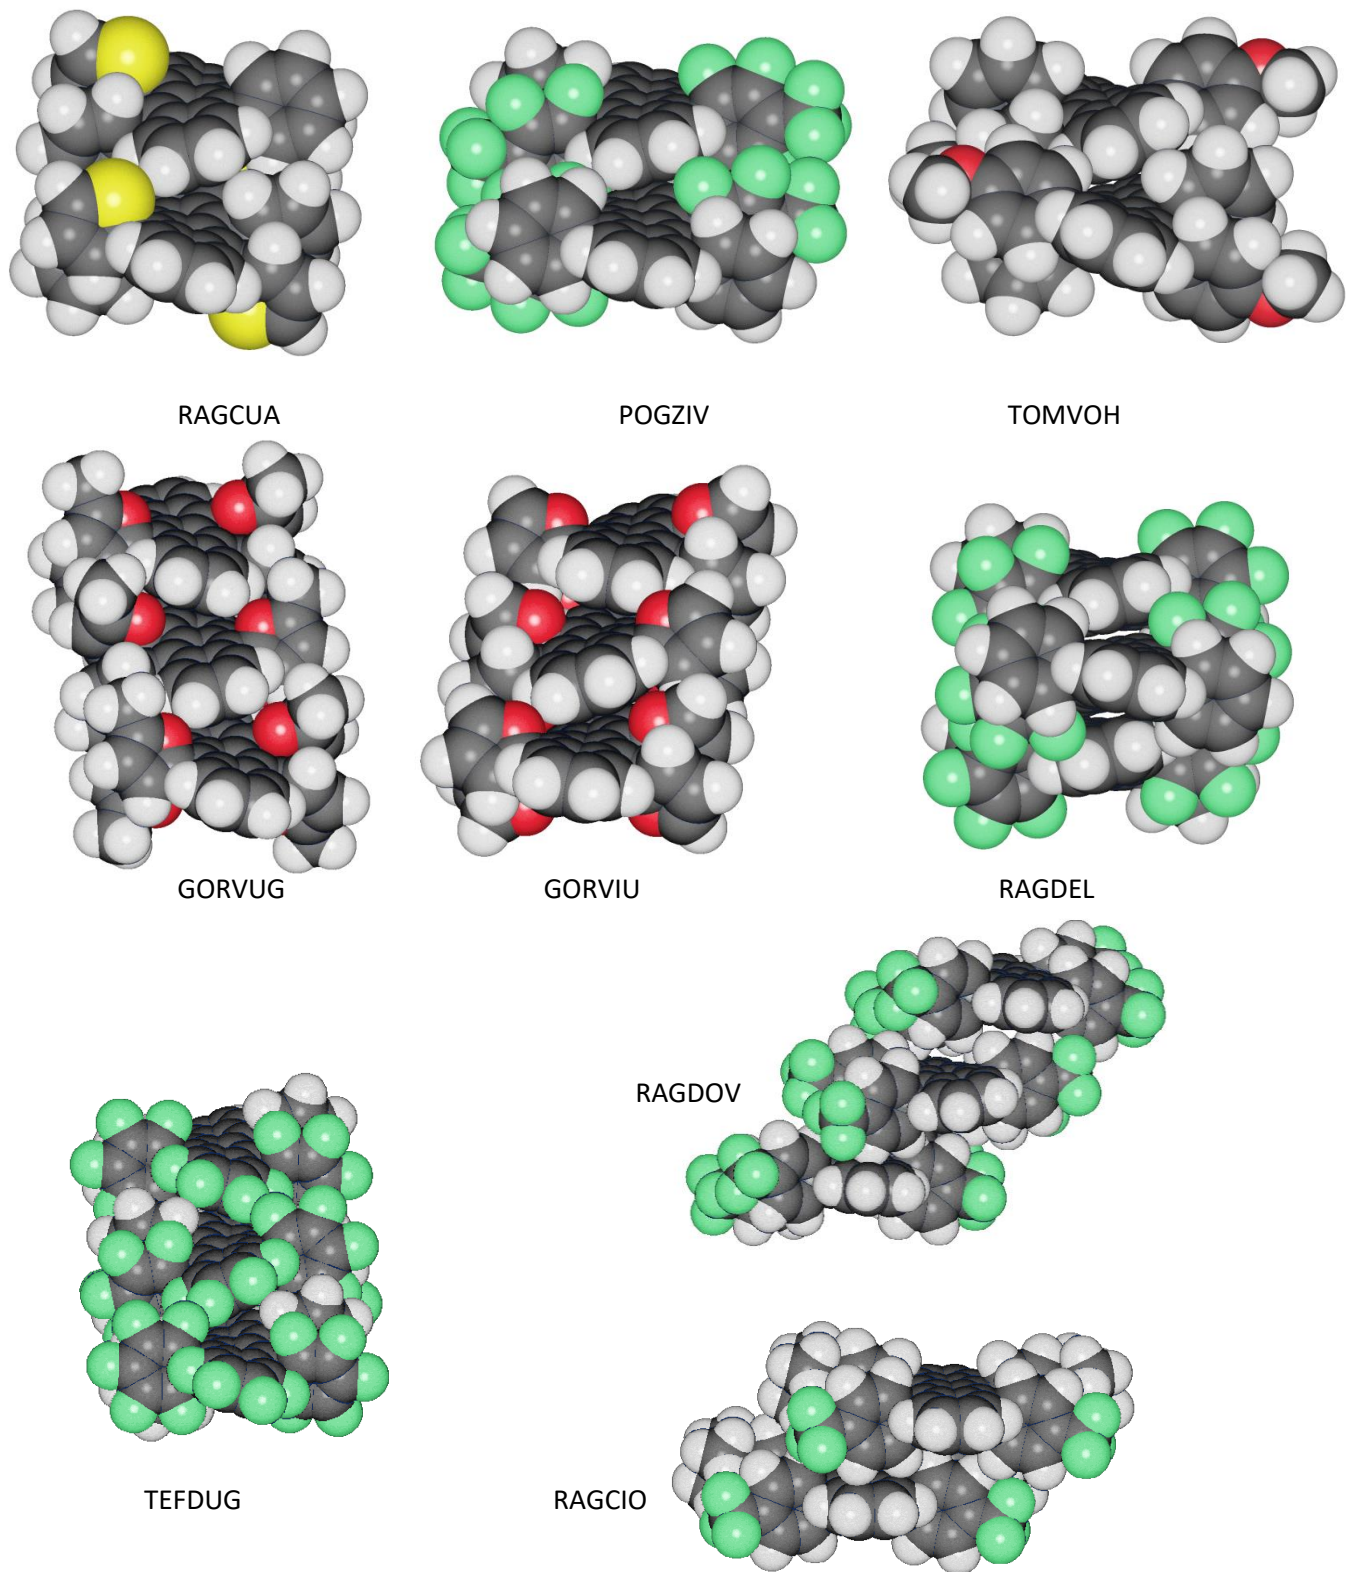

**Figure S3.** A gallery of slipped-cofacial arrangements with CSD refcodes (see Table 1).

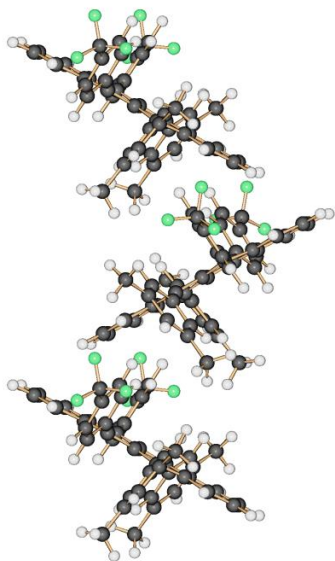

**Figure S4.** MIVDOM: the screw axis sequence  $-x, y \pm 1/2, 3/2-z$  with a very stabilizing pairwise energy;  $R(\text{mm})=7.91 \text{ \AA}$ ,  $E(\text{mm})= -70 \text{ kJ mol}^{-1}$ .

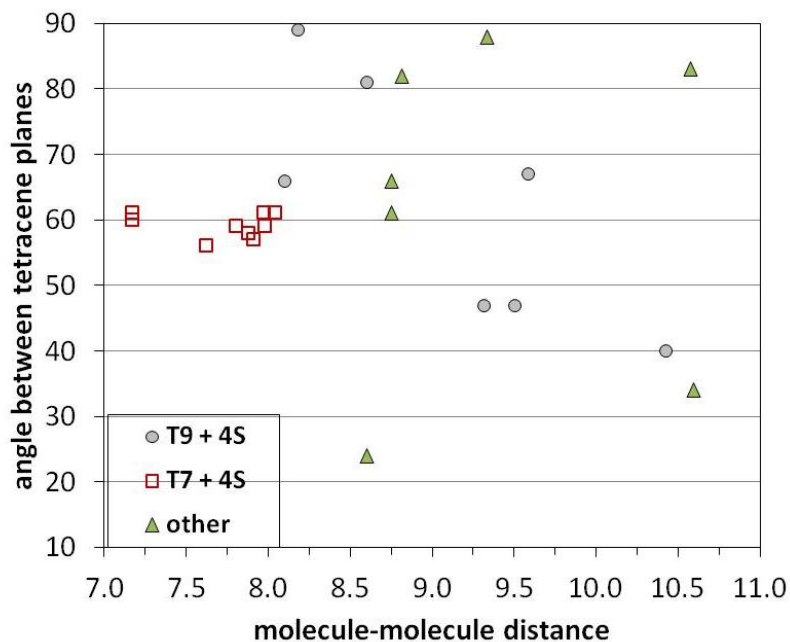

**Figure S5.** Plot of angles between tetracene planes in corrugated (herringbone) propagation motifs. The T7+4S cage motif (Figure 6a) has consistently a  $60^\circ$  angle.

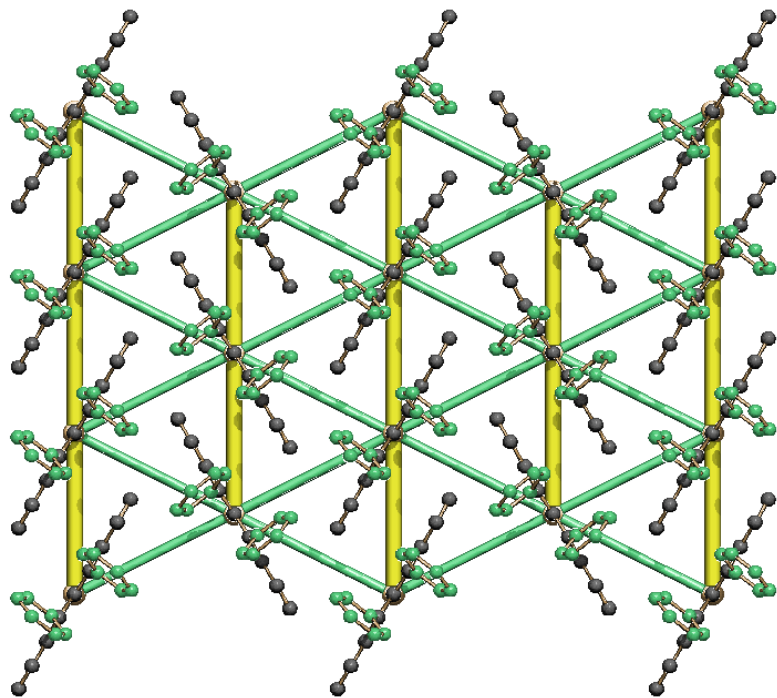

slice (200)

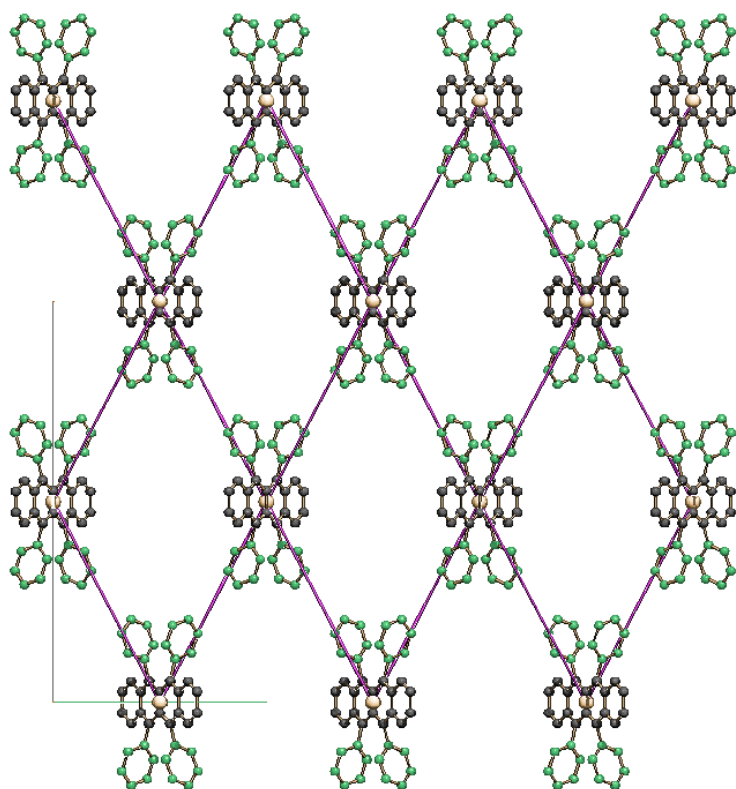

slice (020)

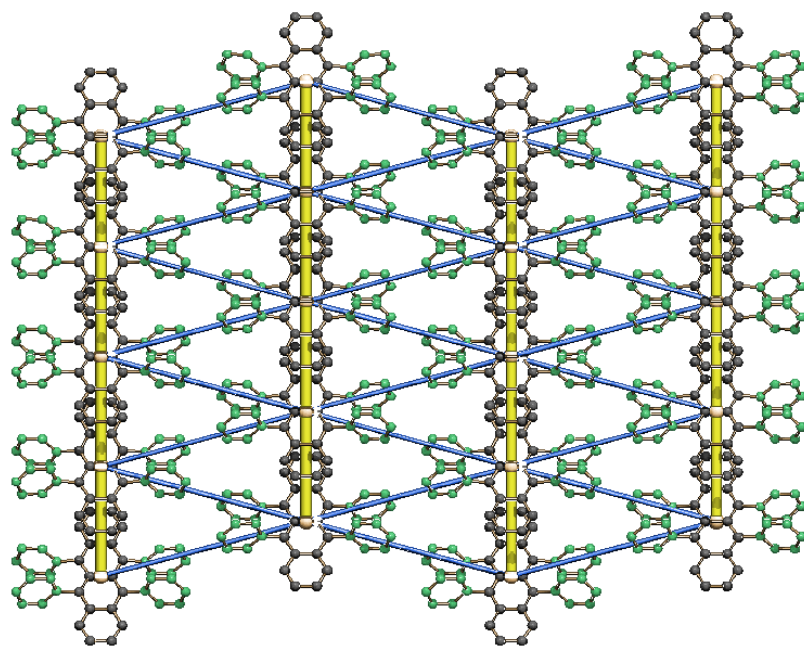

slice (002)

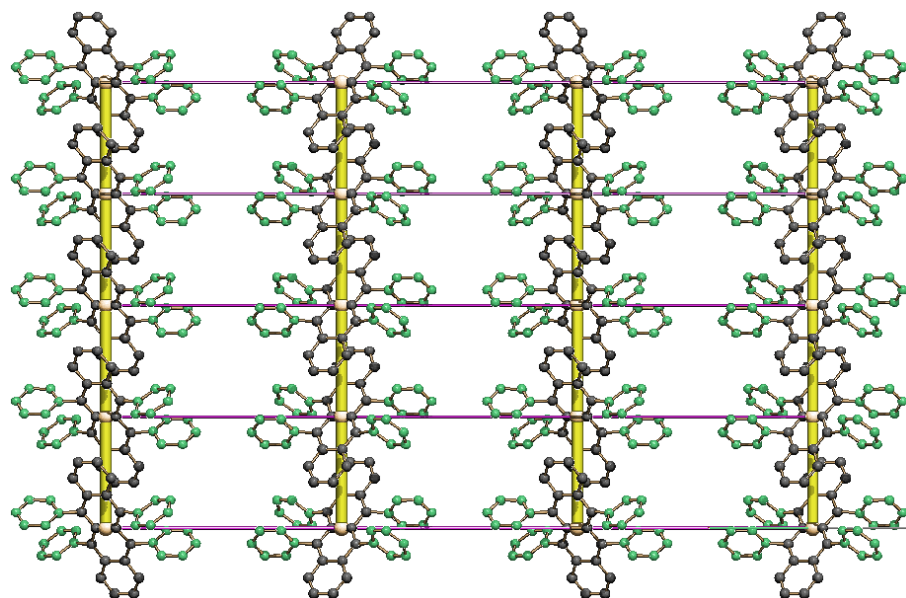

slice (202)



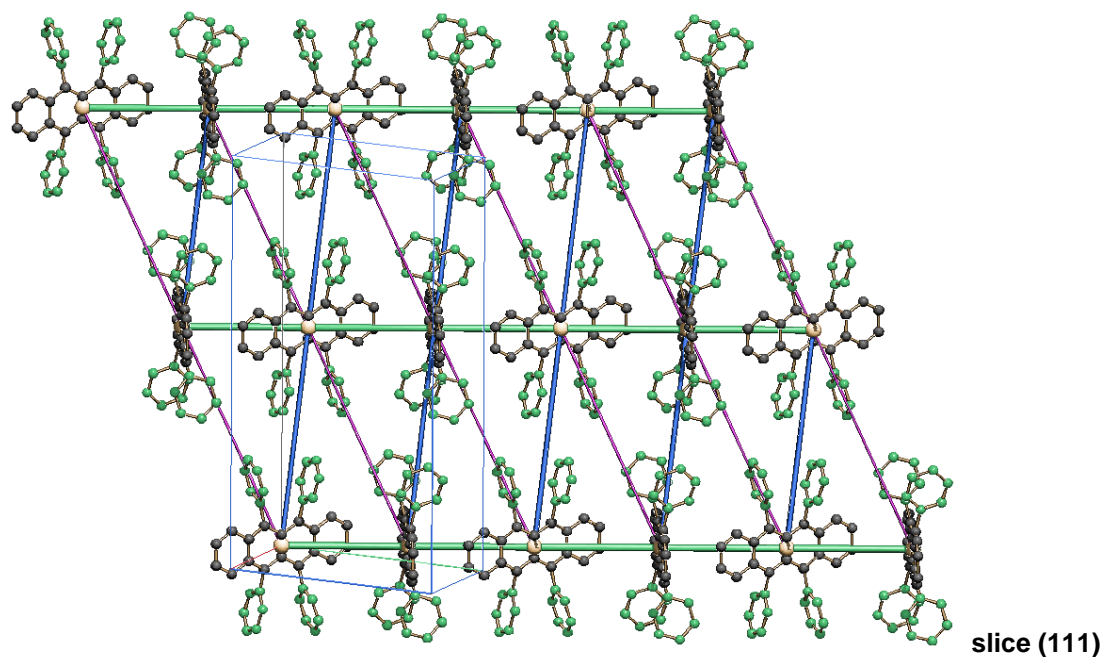

**Figure S6.** Energy crystal graphs in rubrene (QQCIG05). Intermolecular bonds (see Table 3 in the manuscript) are color coded as: bond **a** yellow, bond **b** green, bond **c** cyan, bond **c** purple. All molecular plots and crystal graphs were prepared with program SCHAKAL (E. Keller SCHAKAL99, University of Freiburg - Germany, 1999).

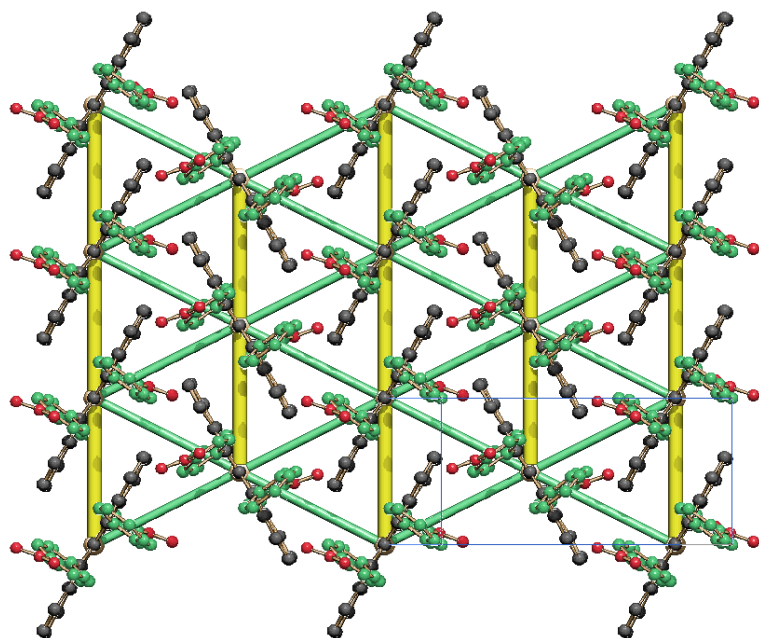

slice (100)

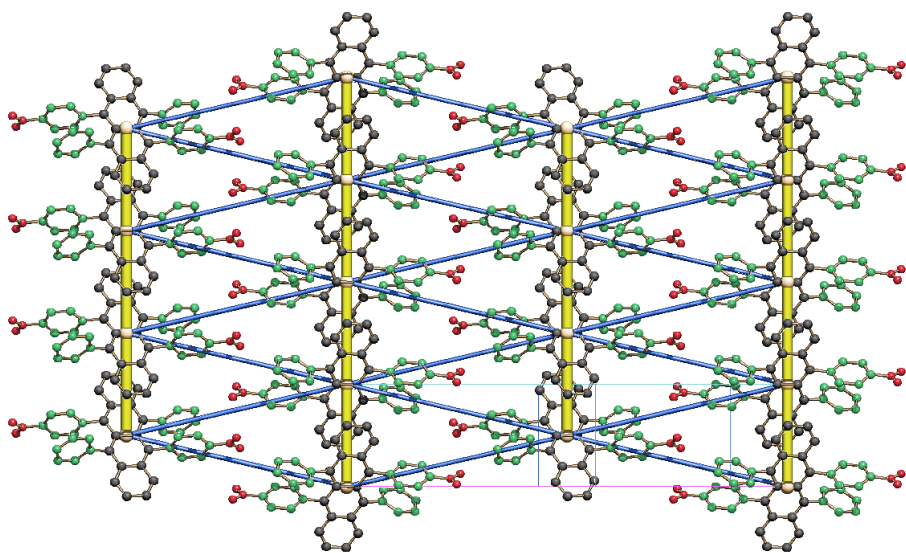

slice (10-2)

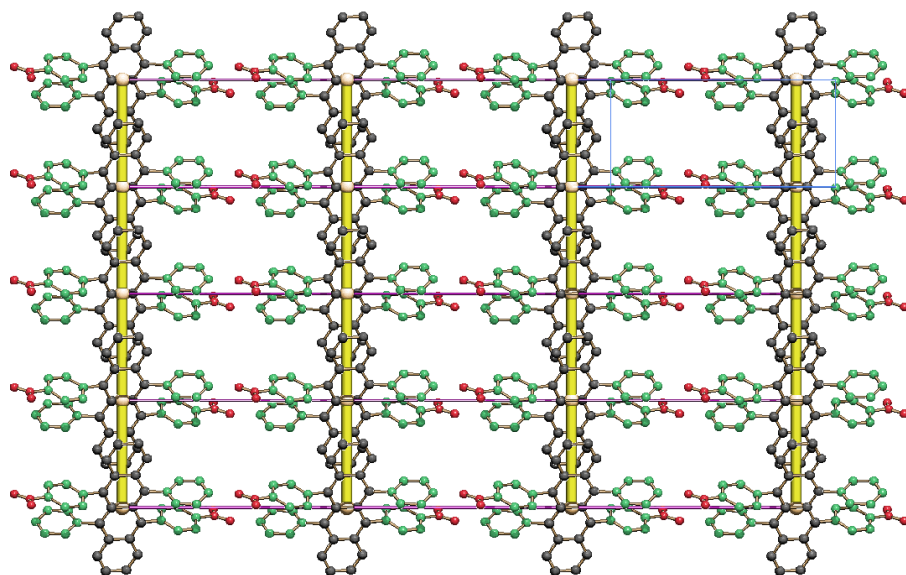

slice (002)

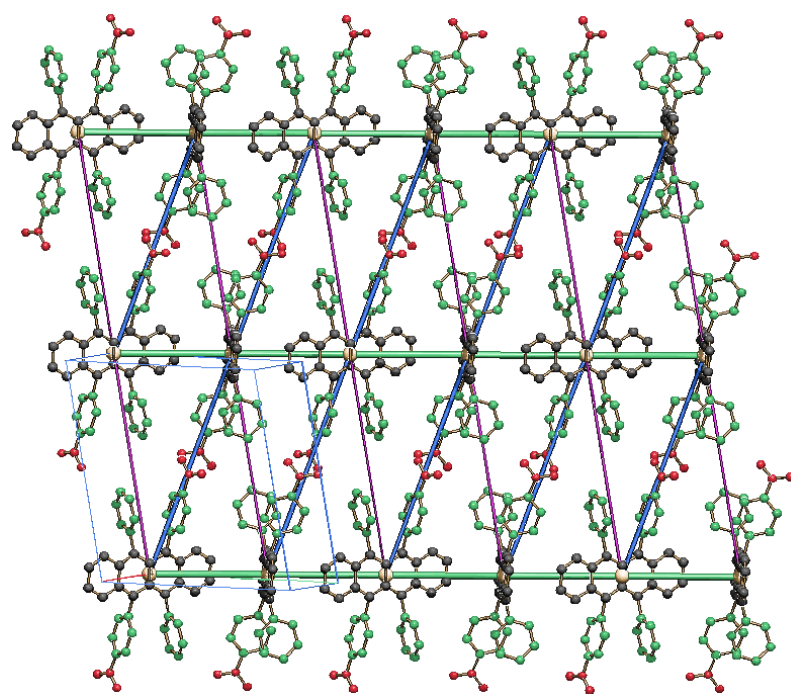

slice (011)

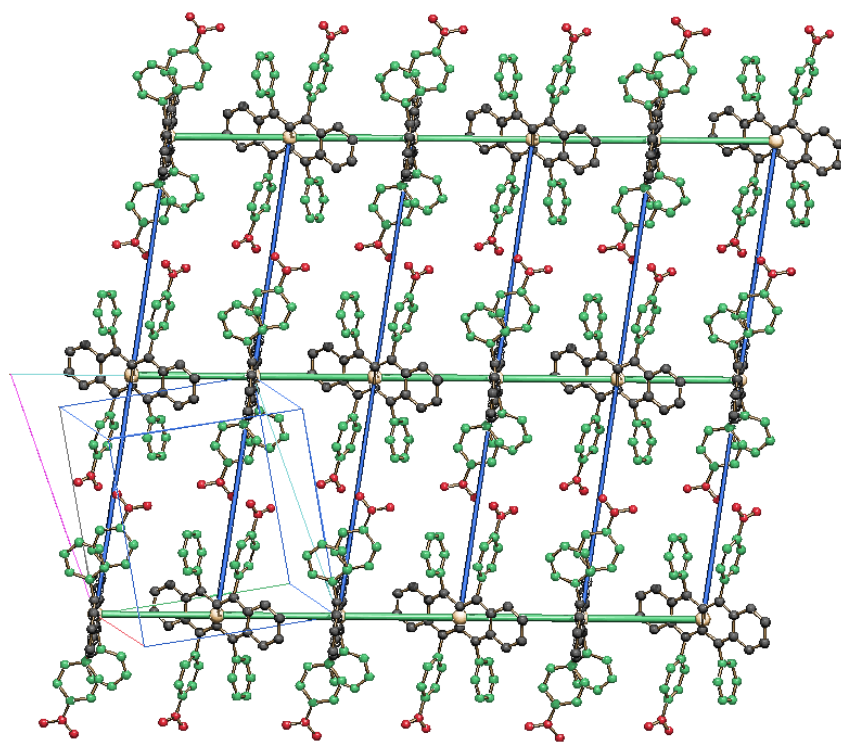

**slice (11-1)**

**Figure S7.** Energy crystal graphs in 5,11-bis(4-nitrophenyl)-6,12-diphenyltetracene (CIYNAB). Intermolecular bonds (see Table 4 in the manuscript) are color coded as: bond **a** yellow, bond **b** green, bond **c** cyan, bond **c** purple.

**TABLE S1.** List of all the rubrene crystal structures in the Cambridge Structural Database. From left to right: Identification code of the Cambridge Structural Database (CSD), Crystallographic *R*-factor, Spce group, Molecules in unit cell, Molecules in asymmetric unit, Temperature of data collection (K), Cell parameters (Å and degrees), Unit cell volume (Å<sup>3</sup>), Reduced cell parameters (Å and degrees), Reduced cell volume (Å<sup>3</sup>).

| Refcode  | Rfac | Space Group | Z  | Z'   | T   | a      | b     | c      | $\alpha$ | $\beta$ | $\gamma$ | Volume | Reduced a | Reduced b | Reduced c | Reduced $\alpha$ | Reduced $\beta$ | Reduced $\gamma$ | Reduced Volume |
|----------|------|-------------|----|------|-----|--------|-------|--------|----------|---------|----------|--------|-----------|-----------|-----------|------------------|-----------------|------------------|----------------|
| AXIDER   | 6.35 | P21/c       | 2  | 0.5  | 293 | 9.0298 | 9.909 | 16.217 | 90       | 90.227  | 90       | 1451   | 9.0298    | 9.9085    | 16.217    | 90               | 90.227          | 90               | 1451           |
| CIYNAB   | 6.73 | P21/c       | 2  | 0.5  | 153 | 15.098 | 7.171 | 14.249 | 90       | 100.616 | 90       | 1516.2 | 7.1706    | 14.2489   | 15.0983   | 100.616          | 90              | 90               | 1516           |
| CIYXUF   | 6.59 | P21/c       | 2  | 0.5  | 123 | 15.978 | 7.276 | 13.981 | 90       | 102.701 | 90       | 1585.7 | 7.2762    | 13.9814   | 15.9782   | 102.701          | 90              | 90               | 1586           |
| CIYYAM   | 6.65 | P21/c       | 2  | 0.5  | 120 | 14.913 | 7.115 | 14.426 | 90       | 98.099  | 90       | 1515.4 | 7.1151    | 14.4263   | 14.9125   | 98.099           | 90              | 90               | 1515           |
| GORVEQ   | 7.77 | P212121     | 4  | 1    | 93  | 9.599  | 13.29 | 25.015 | 90       | 90      | 90       | 3190.5 | 9.599     | 13.287    | 25.015    | 90               | 90              | 90               | 3190           |
| GORVIU   | 4.59 | P-1         | 3  | 1.5  | 93  | 10.553 | 11.34 | 16.568 | 83.481   | 89.45   | 64.275   | 1772.9 | 10.553    | 11.34     | 16.568    | 83.481           | 89.45           | 64.275           | 1773           |
| GORVIU01 | 4.6  | P21/c       | 4  | 1    | 93  | 14.386 | 8.452 | 21.794 | 90       | 116.994 | 90       | 2361.2 | 8.452     | 14.386    | 19.9328   | 103.0291         | 90              | 90               | 2361           |
| GORVUG   | 4.5  | P-1         | 2  | 1    | 93  | 8.5037 | 13.24 | 14.277 | 62.458   | 80.781  | 74.581   | 1373.1 | 8.5037    | 13.244    | 14.277    | 62.458           | 80.781          | 74.581           | 1373           |
| INELUK   | 5.62 | P21/n       | 4  | 1    | 123 | 16.665 | 11.15 | 19.192 | 90       | 90.213  | 90       | 3565.8 | 11.1489   | 16.6651   | 19.1918   | 90.213           | 90              | 90               | 3566           |
| INELUK01 | 6.87 | P-1         | 6  | 3    | 123 | 12.529 | 17.82 | 24.734 | 90.202   | 101.264 | 90.695   | 5414   | 12.5285   | 17.8163   | 24.7339   | 90.202           | 101.264         | 90.695           | 5414           |
| INELUK02 | 4.5  | P21/c       | 2  | 0.5  | 173 | 8.9017 | 10.53 | 17.992 | 90       | 90.408  | 90       | 1686   | 8.9017    | 10.527    | 17.992    | 90               | 90.408          | 90               | 1686           |
| INELUK03 | 7.34 | P21/n       | 4  | 1    | 173 | 16.635 | 11.13 | 19.245 | 90       | 90.581  | 90       | 3564.1 | 11.1334   | 16.635    | 19.245    | 90.581           | 90              | 90               | 3564           |
| KUSDEJ   | 5.27 | Cmca        | 4  | 0.25 | 173 | 34.197 | 7.158 | 14.052 | 90       | 90      | 90       | 3439.5 | 7.1577    | 14.052    | 17.469    | 90               | 101.8218        | 90               | 1720           |
| MIVCUR   | 4.75 | C2/c        | 12 | 1.5  | 173 | 41.257 | 10.15 | 24.038 | 90       | 96.739  | 90       | 9993   | 10.1464   | 21.2432   | 24.038    | 96.5431          | 90              | 103.8166         | 4997           |
| MIVDAY   | 4.31 | P21         | 2  | 1    | 173 | 12.75  | 9.414 | 14.503 | 90       | 99.576  | 90       | 1716.4 | 9.4141    | 12.7495   | 14.5027   | 99.576           | 90              | 90               | 1716           |
| MIVDEC   | 4.21 | Pna21       | 4  | 1    | 173 | 15.205 | 13.9  | 14.31  | 90       | 90      | 90       | 3024.6 | 13.901    | 14.3104   | 15.2045   | 90               | 90              | 90               | 3025           |
| MIVDIG   | 9.52 | Pbcm        | 4  | 0.5  | 123 | 7.1443 | 14.05 | 34.143 | 90       | 90      | 90       | 3427.4 | 7.1443    | 14.051    | 34.143    | 90               | 90              | 90               | 3427           |
| MIVDOM   | 7.61 | Pbcm        | 4  | 0.5  | 123 | 7.5317 | 14.63 | 32.424 | 90       | 90      | 90       | 3573.7 | 7.5317    | 14.634    | 32.424    | 90               | 90              | 90               | 3574           |
| MIVDUS   | 4.59 | Pnma        | 4  | 0.5  | 123 | 7.1162 | 31.18 | 14.208 | 90       | 90      | 90       | 3152.3 | 7.1162    | 14.2075   | 31.179    | 90               | 90              | 90               | 3152           |
| PIFHIW   | 7.42 | Pnma        | 4  | 0.5  | 292 | 14.158 | 35.39 | 7.2215 | 90       | 90      | 90       | 3618.3 | 7.2215    | 14.158    | 35.39     | 90               | 90              | 90               | 3618           |
| PIFHOC   | 9.77 | P21/c       | 4  | 1    | 292 | 23.527 | 9.028 | 17.764 | 90       | 95.928  | 90       | 3752.8 | 9.0277    | 17.764    | 23.527    | 95.928           | 90              | 90               | 3753           |
| PIXPOD   | 4.3  | P21         | 2  | 1    | 173 | 11.401 | 8.994 | 13.989 | 90       | 113.59  | 90       | 1314.6 | 8.9944    | 11.401    | 13.989    | 113.59           | 90              | 90               | 1315           |
| PIXPOD01 | 5.01 | P21/c       | 4  | 1    | 93  | 13.601 | 9.248 | 20.718 | 90       | 92.771  | 90       | 2602.9 | 9.2479    | 13.601    | 20.718    | 92.771           | 90              | 90               | 2603           |
| PIXPUJ   | 6.49 | P21/c       | 2  | 0.5  | 173 | 10.173 | 8.915 | 14.751 | 90       | 95.17   | 90       | 1332.3 | 8.9148    | 10.173    | 14.751    | 95.17            | 90              | 90               | 1332           |
| PIXPUJ01 | 6.87 | P21/c       | 2  | 0.5  | 120 | 13.568 | 7.014 | 14.302 | 90       | 103.954 | 90       | 1320.9 | 7.0143    | 13.5679   | 14.302    | 103.954          | 90              | 90               | 1321           |
| POGZIV   | 6.91 | P21/c       | 8  | 2    | 294 | 22.036 | 8.803 | 30.252 | 90       | 104.921 | 90       | 5670.8 | 8.8034    | 22.036    | 30.252    | 104.921          | 90              | 90               | 5671           |

| Refcode  | Rfac | Space Group | Z | Z'   | T   | a      | b     | c      | $\alpha$ | $\beta$ | $\gamma$ | Volume | Reduced a | Reduced b | Reduced c | Reduced $\alpha$ | Reduced $\beta$ | Reduced $\gamma$ | Reduced Volume |
|----------|------|-------------|---|------|-----|--------|-------|--------|----------|---------|----------|--------|-----------|-----------|-----------|------------------|-----------------|------------------|----------------|
| QQQCIG   |      | Aba2        | 4 | 0.5  | 295 | 14.44  | 7.18  | 26.97  | 90       | 90      | 90       | 2796.2 | 7.18      | 13.9547   | 14.44     | 90               | 90              | 104.908          | 1398           |
| QQQCIG01 | 3.2  | Bbam        | 4 | 0.25 | 295 | 7.184  | 14.43 | 26.897 | 90       | 90      | 90       | 2788.9 | 7.184     | 13.9199   | 14.433    | 90               | 90              | 104.954          | 1394           |
| QQQCIG02 |      |             | 1 | 0    | 295 | 9.15   | 11.6  | 7.16   | 103.53   | 112.97  | 90.98    | 675.28 | 0         | 0         | 0         | 0                | 0               | 0                | 0              |
| QQQCIG03 |      | P21/a       | 2 | 0.5  | 295 | 15.5   | 10.1  | 8.8    | 90       | 90.55   | 90       | 1377.6 | 8.8       | 10.1      | 15.5      | 90               | 90.55           | 90               | 1378           |
| QQQCIG04 | 3.72 | Cmca        | 4 | 0.25 | 100 | 26.789 | 7.17  | 14.211 | 90       | 90      | 90       | 2729.6 | 7.17      | 13.866    | 14.211    | 90               | 90              | 104.984          | 1365           |
| QQQCIG05 | 3.77 | Cmca        | 4 | 0.25 | 125 | 26.789 | 7.173 | 14.246 | 90       | 90      | 90       | 2737.5 | 7.173     | 13.8664   | 14.246    | 90               | 90              | 104.990          | 1369           |
| QQQCIG06 | 3.87 | Cmca        | 4 | 0.25 | 150 | 26.775 | 7.168 | 14.258 | 90       | 90      | 90       | 2736.4 | 7.168     | 13.8589   | 14.258    | 90               | 90              | 104.987          | 1368           |
| QQQCIG07 | 3.88 | Cmca        | 4 | 0.25 | 175 | 26.828 | 7.181 | 14.306 | 90       | 90      | 90       | 2756.1 | 7.181     | 13.8862   | 14.306    | 90               | 90              | 104.985          | 1378           |
| QQQCIG08 | 4.07 | Cmca        | 4 | 0.25 | 200 | 26.838 | 7.181 | 14.332 | 90       | 90      | 90       | 2762.1 | 7.181     | 13.8911   | 14.332    | 90               | 90              | 104.980          | 1381           |
| QQQCIG09 | 4.05 | Cmca        | 4 | 0.25 | 235 | 26.818 | 7.174 | 14.348 | 90       | 90      | 90       | 2760.4 | 7.174     | 13.8805   | 14.348    | 90               | 90              | 104.976          | 1380           |
| QQQCIG10 | 4.19 | Cmca        | 4 | 0.25 | 275 | 26.938 | 7.211 | 14.461 | 90       | 90      | 90       | 2809   | 7.211     | 13.9432   | 14.461    | 90               | 90              | 104.986          | 1405           |
| QQQCIG11 | 4.4  | Cmca        | 4 | 0.25 | 293 | 26.86  | 7.193 | 14.433 | 90       | 90      | 90       | 2788.5 | 7.193     | 13.9032   | 14.433    | 90               | 90              | 104.992          | 1394           |
| QQQCIG12 |      | Cmca        | 4 | 0.25 | 295 | 26.901 | 7.187 | 14.43  | 90       | 90      | 90       | 2789.9 | 7.187     | 13.9223   | 14.43     | 90               | 90              | 104.958          | 1395           |
| QQQCIG13 | 4.94 | P21/c       | 2 | 0.5  | 173 | 8.7397 | 10.13 | 15.635 | 90       | 90.98   | 90       | 1383.3 | 8.7397    | 10.125    | 15.635    | 90               | 90.98           | 90               | 1383           |
| QQQCIG14 | 6.72 | P-1         | 1 | 0.5  | 173 | 7.0196 | 8.543 | 11.948 | 93.04    | 105.58  | 96.28    | 683.5  | 7.0196    | 8.5432    | 11.948    | 93.04            | 105.58          | 96.28            | 684            |
| QQQCIG15 | 4.02 | Bbcm        | 4 | 0.25 | 293 | 7.175  | 14.44 | 26.812 | 90       | 90      | 90       | 2776.9 | 7.175     | 13.8777   | 14.435    | 90               | 90              | 104.981          | 1388           |
| QQQCIG16 | 4.6  | Cmca        | 4 | 0.25 | 100 | 26.797 | 7.162 | 14.194 | 90       | 90      | 90       | 2724   | 7.1617    | 13.8689   | 14.194    | 90               | 90              | 104.963          | 1362           |
| QQQCIG17 | 2.2  | Cmca        | 4 | 0.25 | 100 | 26.811 | 7.16  | 14.203 | 90       | 90      | 90       | 2726.5 | 7.1602    | 13.8751   | 14.2029   | 90               | 90              | 104.953          | 1363           |
| QQQCIG18 | 2.2  | Cmca        | 4 | 0.25 | 100 | 26.811 | 7.16  | 14.203 | 90       | 90      | 90       | 2726.5 | 7.1602    | 13.8751   | 14.2029   | 90               | 90              | 104.953          | 1363           |
| QQQCIG19 | 4.7  | Cmca        | 4 | 0.25 | 100 | 26.811 | 7.16  | 14.203 | 90       | 90      | 90       | 2726.5 | 7.1602    | 13.8751   | 14.2029   | 90               | 90              | 104.953          | 1363           |
| QQQCIG20 | 3.3  | Cmca        | 4 | 0.25 | 100 | 26.811 | 7.16  | 14.203 | 90       | 90      | 90       | 2726.5 | 7.1602    | 13.8751   | 14.2029   | 90               | 90              | 104.953          | 1363           |
| QQQCIG21 | 2.57 | Cmca        | 4 | 0.25 | 100 | 26.811 | 7.16  | 14.203 | 90       | 90      | 90       | 2726.5 | 7.1602    | 13.8751   | 14.2029   | 90               | 90              | 104.953          | 1363           |
| QQQCIG22 | 2.2  | Cmca        | 4 | 0.25 | 100 | 26.811 | 7.16  | 14.203 | 90       | 90      | 90       | 2726.5 | 7.1602    | 13.8751   | 14.2029   | 90               | 90              | 104.953          | 1363           |
| QQQCIG23 | 2    | Cmca        | 4 | 0.25 | 20  | 26.797 | 7.16  | 14.152 | 90       | 90      | 90       | 2715.2 | 7.1599    | 13.8683   | 14.1519   | 90               | 90              | 104.960          | 1358           |
| QQQCIG24 | 5.89 | P-1         | 1 | 0.5  | 293 | 7.0478 | 8.55  | 11.949 | 93.201   | 105.501 | 96.079   | 687.21 | 7.0478    | 8.5495    | 11.9485   | 93.201           | 105.501         | 96.079           | 687            |
| QQQCIG25 | 4.5  | P-1         | 1 | 0.5  | 293 | 6.8535 | 8.264 | 11.657 | 91.614   | 104.921 | 96.311   | 633.03 | 6.8535    | 8.2642    | 11.6573   | 91.614           | 104.921         | 96.311           | 633            |
| QQQCIG26 | 6.02 | P-1         | 1 | 0.5  | 293 | 6.7392 | 8.059 | 11.464 | 90.271   | 104.627 | 96.329   | 598.44 | 6.7392    | 8.0591    | 11.4641   | 90.271           | 104.627         | 96.329           | 598            |
| QQQCIG27 | 6.56 | P-1         | 1 | 0.5  | 293 | 6.6779 | 7.926 | 11.342 | 89.367   | 104.46  | 96.321   | 577.63 | 6.6779    | 7.9256    | 11.3415   | 89.367           | 75.54           | 83.679           | 578            |
| QQQCIG28 | 6.39 | P-1         | 1 | 0.5  | 293 | 6.635  | 7.8   | 11.218 | 88.437   | 104.348 | 96.316   | 559.02 | 6.635     | 7.7995    | 11.2182   | 88.437           | 75.652          | 83.684           | 559            |
| QQQCIG29 | 5.61 | P-1         | 1 | 0.5  | 293 | 6.6162 | 7.676 | 11.1   | 87.399   | 104.322 | 96.289   | 542.81 | 6.6162    | 7.6757    | 11.1002   | 87.399           | 75.678          | 83.711           | 543            |
| QQQCIG30 | 6    | P-1         | 2 | 1    | 293 | 14.24  | 6.774 | 11.281 | 81.264   | 100.378 | 101.773  | 1040.3 | 6.7738    | 11.281    | 14.2395   | 79.622           | 78.227          | 81.264           | 1040           |

| Refcode | Rfac | Space Group | Z | Z'   | T   | a      | b     | c      | $\alpha$ | $\beta$ | $\gamma$ | Volume | Reduced a | Reduced b | Reduced c | Reduced $\alpha$ | Reduced $\beta$ | Reduced $\gamma$ | Reduced Volume |
|---------|------|-------------|---|------|-----|--------|-------|--------|----------|---------|----------|--------|-----------|-----------|-----------|------------------|-----------------|------------------|----------------|
| QQCIG31 | 5.24 | P-1         | 1 | 0.5  | 293 | 7.0883 | 8.599 | 12.006 | 93.486   | 105.642 | 95.977   | 697.86 | 7.0883    | 8.5994    | 12.0059   | 93.486           | 105.642         | 95.977           | 698            |
| QQCIG32 | 5.26 | P-1         | 1 | 0.5  | 293 | 7.082  | 8.58  | 11.982 | 93.36    | 105.63  | 96.02    | 694.41 | 7.082     | 8.58      | 11.982    | 93.36            | 105.63          | 96.02            | 694            |
| QQCIG33 | 2.56 | Cmca        | 4 | 0.25 | 100 | 26.797 | 7.162 | 14.194 | 90       | 90      | 90       | 2724   | 7.1617    | 13.8689   | 14.194    | 90               | 90              | 104.963          | 1362           |
| RAGCEK  | 5.59 | P21/c       | 4 | 1    | 123 | 15.88  | 29.54 | 7.9956 | 90       | 91.745  | 90       | 3749.2 | 7.9956    | 15.88     | 29.5419   | 90               | 90              | 91.745           | 3749           |
| RAGCIO  | 6.14 | P2/c        | 4 | 1    | 123 | 31.29  | 7.403 | 17.207 | 90       | 90.524  | 90       | 3985.7 | 7.403     | 17.2071   | 31.2902   | 90.524           | 90              | 90               | 3986           |
| RAGCOU  | 6.82 | P21         | 4 | 2    | 123 | 16.408 | 15.28 | 16.446 | 90       | 97.838  | 90       | 4084   | 15.2768   | 16.4083   | 16.4464   | 97.838           | 90              | 90               | 4084           |
| RAGCUA  | 3.74 | C2/c        | 4 | 0.5  | 123 | 31.027 | 14.68 | 7.3302 | 90       | 93.322  | 90       | 3332.5 | 7.3302    | 14.6772   | 17.1618   | 115.316          | 93.003          | 90               | 1666           |
| RAGDAH  | 3.23 | P21/n       | 4 | 1    | 123 | 14.856 | 9.198 | 27.452 | 90       | 103.528 | 90       | 3647.1 | 9.1983    | 14.8556   | 27.4515   | 103.528          | 90              | 90               | 3647           |
| RAGDEL  | 4.71 | P-1         | 2 | 1    | 123 | 7.3564 | 14.7  | 15.712 | 65.973   | 88.823  | 89.903   | 1551.9 | 7.3564    | 14.7042   | 15.7118   | 65.973           | 88.823          | 89.903           | 1552           |
| RAGDIP  | 3.89 | P-1         | 2 | 1    | 123 | 7.9792 | 12.79 | 16.774 | 92.313   | 95.376  | 105.306  | 1640.5 | 7.9792    | 12.793    | 16.7743   | 92.313           | 95.376          | 105.306          | 1641           |
| RAGDOV  | 7.13 | C2/c        | 4 | 0.5  | 123 | 18.275 | 16.4  | 14.486 | 90       | 126.468 | 90       | 3490.8 | 12.2764   | 12.2764   | 14.2549   | 110.888          | 114.307         | 96.201           | 1745           |
| TEFDUG  | 7.48 | Pnna        | 4 | 0.5  | 173 | 15.521 | 28.08 | 7.3931 | 90       | 90      | 90       | 3222.2 | 7.3931    | 15.5207   | 28.081    | 90               | 90              | 90               | 3222           |
| TOMVOH  | 4.15 | Pbca        | 8 | 1    | 120 | 15.766 | 13.86 | 28.351 | 90       | 90      | 90       | 6194.7 | 13.859    | 15.766    | 28.351    | 90               | 90              | 90               | 6195           |
| TOMVUN  | 5.49 | Cmca        | 4 | 0.25 | 120 | 27.45  | 7.102 | 14.327 | 90       | 90      | 90       | 2793   | 7.102     | 14.1769   | 14.327    | 90               | 90              | 104.506          | 1397           |
| TOMWAU  | 5.59 | P21/n       | 4 | 1    | 120 | 17.677 | 9.424 | 18.571 | 90       | 103.79  | 90       | 3004.5 | 9.424     | 17.677    | 18.571    | 103.79           | 90              | 90               | 3005           |
| VICHAT  | 4.09 | P-1         | 1 | 0.5  | 100 | 7.0727 | 8.27  | 11.855 | 90.402   | 106.039 | 97.605   | 659.84 | 7.0727    | 8.2696    | 11.855    | 90.402           | 106.039         | 97.605           | 660            |

**Table S2.** Comparison of the CLP, LJC and Pixel force fields for some molecule-molecule energies in some isostructural rubrene derivatives. For each entry:

molecule-molecule distance (Å), symmetry operation number  
 LJC energies (kJ mol<sup>-1</sup>), Coulombic, polarization, dispersion, repulsion, total  
 PIXEL energies, id.  
 CLP energies, id.

|        | symmetry operation |                  | cell translation |       |        |       |  |
|--------|--------------------|------------------|------------------|-------|--------|-------|--|
|        | 1                  | x, y, z          |                  |       |        |       |  |
|        | 2                  | -x, 1/2+y, 1/2-z | screw axis       |       |        |       |  |
| CIYXUF | 7.880              | 2                | 0.00             | -0.50 | -0.50  |       |  |
|        | -6.7               | 0.0              | -73.9            | 27.4  | -53.2  |       |  |
|        | -17.21             | -7.26            | -64.40           | 38.08 | -50.79 |       |  |
|        | -6.1               | -4.7             | -58.8            | 18.6  | -51.0  |       |  |
|        | 7.276              | 1                | 0.00             | -1.00 | 0.00   |       |  |
|        | 8.2                | 0.0              | -109.9           | 41.4  | -60.4  |       |  |
|        | -3.88              | -10.47           | -97.94           | 54.91 | -57.38 |       |  |
|        | 7.7                | -5.2             | -87.9            | 29.7  | -55.7  |       |  |
|        | CIYYAM             | 8.043            | 2                | 0.00  | -0.50  | -0.50 |  |
|        |                    | -5.3             | 0.0              | -62.9 | 20.7   | -47.4 |  |
| -13.28 |                    | -5.98            | -57.73           | 29.46 | -47.53 |       |  |
| -4.6   |                    | -4.0             | -50.6            | 12.8  | -46.4  |       |  |
| 7.115  |                    | 1                | 0.00             | -1.00 | 0.00   |       |  |
| 11.7   |                    | 0.0              | -107.8           | 39.6  | -56.5  |       |  |
| -1.09  |                    | -11.51           | -97.73           | 54.06 | -56.26 |       |  |
| 10.5   |                    | -5.0             | -87.1            | 34.5  | -47.2  |       |  |
| CIYNAB |                    | 7.976            | 2                | 0.00  | -0.50  | -0.50 |  |
|        |                    | -5.5             | 0.0              | -70.2 | 24.7   | -51.0 |  |
|        | -14.71             | -7.28            | -62.94           | 34.60 | -50.34 |       |  |
|        | -4.1               | -4.9             | -56.0            | 15.6  | -49.4  |       |  |
|        | 7.171              | 1                | 0.00             | -1.00 | 0.00   |       |  |
|        | 11.6               | 0.0              | -109.7           | 42.4  | -55.6  |       |  |
|        | -1.84              | -12.79           | -99.26           | 57.06 | -56.84 |       |  |
|        | 11.2               | -5.5             | -88.5            | 36.7  | -46.0  |       |  |



**Table S3.** Energy (CLP) and density data for the crystal structures in the database.

For each entry:

first line: CSD refcode Cell vol (Å<sup>3</sup>) density (g cm<sup>-3</sup>) packing factor  
 second line: CSD refcode E<sub>coul</sub> E<sub>pol</sub> E<sub>disp</sub> E<sub>rep</sub> E<sub>tot</sub> (kJ mol<sup>-1</sup>)

|          |       |         |       |        |       |        |
|----------|-------|---------|-------|--------|-------|--------|
| AXIDER   | P21/c | 1450.95 | 1.384 | 0.721  |       |        |
| AXIDER   | P21/c | -11.8   | -26.2 | -228.3 | 69.7  | -196.6 |
| CIYNAB   | P21/c | 1516.24 | 1.364 | 0.738  |       |        |
| CIYNAB   | P21/c | -19.3   | -35.1 | -269.3 | 107.8 | -215.8 |
| CIYNAB01 | P-1   | 775.14  | 1.334 | 0.718  |       |        |
| CIYNAB01 | P-1   | -15.0   | -32.1 | -243.0 | 73.2  | -216.8 |
| CIYXUF   | P21/c | 1585.71 | 1.401 | 0.716  |       |        |
| CIYXUF   | P21/c | -7.5    | -29.1 | -256.7 | 86.9  | -206.5 |
| CIYYAM   | P21/c | 1515.42 | 1.277 | 0.723  |       |        |
| CIYYAM   | P21/c | -24.8   | -29.5 | -251.7 | 83.9  | -222.1 |
| GORVIU01 | P21/c | 2361.24 | 1.386 | 0.736  |       |        |
| GORVIU01 | P21/c | -17.1   | -26.9 | -230.3 | 77.0  | -197.2 |
| GORVUG   | P-1   | 1373.07 | 1.327 | 0.724  |       |        |
| GORVUG   | P-1   | -11.7   | -49.5 | -259.8 | 100.0 | -221.0 |
| INELUK   | P21/n | 3565.76 | 1.931 | 0.723  |       |        |
| INELUK   | P21/n | -34.6   | -35.4 | -229.3 | 115.1 | -184.2 |
| INELUK02 | P21/c | 1685.96 | 2.042 | 0.765  |       |        |
| INELUK02 | P21/c | -47.5   | -38.6 | -262.4 | 133.4 | -215.1 |
| MIVCUR   | C2/c  | 9993.03 | 1.174 | 0.680  |       |        |
| MIVCUR   | C2/c  | -8.3    | -29.7 | -231.0 | 75.0  | -194.0 |
| MIVDOM   | Pbcm  | 3573.74 | 1.347 | 0.704  |       |        |
| MIVDOM   | Pbcm  | -7.2    | -40.5 | -257.9 | 81.7  | -223.9 |
| PIFHOC   | P21/c | 3752.80 | 1.141 | 0.672  |       |        |
| PIFHOC   | P21/c | -5.8    | -35.7 | -226.6 | 59.6  | -208.5 |
| PIXPOD01 | P21/c | 2602.88 | 1.421 | 0.724  |       |        |
| PIXPOD01 | P21/c | -16.4   | -40.5 | -241.7 | 72.0  | -226.6 |
| PIXPUJ01 | P21/c | 1320.94 | 1.370 | 0.740  |       |        |
| PIXPUJ01 | P21/c | -8.3    | -31.2 | -250.3 | 68.2  | -221.5 |
| POGZIV   | P21/c | 5670.76 | 1.276 | 0.685  |       |        |
| POGZIV   | P21/c | -2.4    | -27.7 | -206.6 | 53.0  | -183.7 |
| RAGDAH   | P21/n | 3647.07 | 1.531 | 0.700  |       |        |
| RAGDAH   | P21/n | -19.4   | -37.8 | -241.9 | 105.8 | -193.2 |
| MIVDAY   | P21   | 1716.43 | 1.194 | 0.699  |       |        |
| MIVDAY   | P21   | -9.5    | -36.4 | -250.3 | 76.8  | -219.4 |
| MIVDEC   | Pna21 | 3024.61 | 1.231 | 0.709  |       |        |
| MIVDEC   | Pna21 | -7.0    | -26.3 | -241.6 | 76.2  | -198.7 |
| MIVDUS   | Pnma  | 3152.30 | 1.409 | 0.719  |       |        |
| MIVDUS   | Pnma  | -4.0    | -29.1 | -252.5 | 82.4  | -203.2 |
| PIFHIW   | Pnma  | 3618.34 | 1.184 | 0.697  |       |        |
| PIFHIW   | Pnma  | -2.5    | -37.5 | -262.0 | 65.2  | -236.9 |
| QQQCIG05 | Cmca  | 2737.48 | 1.293 | 0.739  |       |        |
| QQQCIG05 | Cmca  | -9.8    | -22.7 | -252.0 | 79.3  | -205.1 |
| QQQCIG13 | P21/c | 1383.33 | 1.279 | 0.731  |       |        |
| QQQCIG13 | P21/c | -15.7   | -22.3 | -241.6 | 72.7  | -206.8 |
| QQQCIG14 | P-1   | 683.50  | 1.294 | 0.740  |       |        |
| QQQCIG14 | P-1   | -4.1    | -22.8 | -246.4 | 76.9  | -196.4 |
| RAGCEK   | P21/c | 3749.20 | 1.475 | 0.703  |       |        |

|        |       |         |       |        |       |        |
|--------|-------|---------|-------|--------|-------|--------|
| RAGCEK | P21/c | -7.1    | -40.9 | -252.8 | 97.1  | -203.7 |
| RAGCIO | P2/c  | 3985.71 | 1.301 | 0.696  |       |        |
| RAGCIO | P2/c  | -9.8    | -45.6 | -257.1 | 79.7  | -232.7 |
| RAGCUA | C2/c  | 3332.51 | 1.620 | 0.728  |       |        |
| RAGCUA | C2/c  | -10.4   | -34.2 | -254.3 | 113.7 | -185.3 |
| RAGDEL | P-1   | 1551.92 | 1.525 | 0.715  |       |        |
| RAGDEL | P-1   | -13.8   | -25.8 | -230.4 | 105.8 | -164.1 |
| RAGDIP | P-1   | 1640.50 | 1.807 | 0.737  |       |        |
| RAGDIP | P-1   | -17.0   | -32.3 | -245.1 | 108.4 | -186.0 |
| RAGDOV | C2/c  | 3490.80 | 1.531 | 0.718  |       |        |
| RAGDOV | C2/c  | -17.8   | -37.1 | -262.9 | 96.2  | -221.6 |
| TEFDUG | Pnna  | 3222.18 | 1.617 | 0.714  |       |        |
| TEFDUG | Pnna  | -26.6   | -28.0 | -231.8 | 108.1 | -178.3 |
| TOMVOH | Pbca  | 6194.72 | 1.271 | 0.718  |       |        |
| TOMVOH | Pbca  | -10.7   | -30.0 | -256.7 | 86.8  | -210.7 |
| TOMWAU | P21/n | 3004.53 | 1.324 | 0.720  |       |        |
| TOMWAU | P21/n | -19.5   | -28.0 | -250.4 | 98.3  | -199.5 |
| VICHAT | P-1   | 659.84  | 1.346 | 0.755  |       |        |
| VICHAT | P-1   | -13.1   | -24.3 | -263.2 | 85.6  | -215.0 |

**Table S4.** A summary of pairwise molecular couplings with the slipped cofacial configuration. Distances in Å, energies (AA-CLP) in kJ mol<sup>-1</sup>. T, translation, Inv inversion, other operations with coordinate transformation.

**translation**

|          |       |     |    |
|----------|-------|-----|----|
| CIYNAB   | 7.171 | -46 | Ty |
| CIYXUF   | 7.276 | -56 | Ty |
| CIYYAM   | 7.115 | -47 | Ty |
| PIXPUJ   | 7.014 | -64 | Ty |
| PIFHIW   | 7.221 | -69 | Tz |
| MIVDOM   | 7.532 | -63 | Tx |
| QQQCIG05 | 7.173 | -53 | Ty |
| QQQCIG14 | 7.020 | -56 | Tx |
| RAGCEK   | 7.996 | -63 | Tz |
| RAGDIP   | 7.979 | -63 | Tx |
| VICHAT   | 7.073 | -63 | Tx |
| MIVDUS   | 7.116 | -63 | Tx |

**other**

|        |       |     |        |         |
|--------|-------|-----|--------|---------|
| RAGCUA | 7.418 | -54 | Inv    | 1 0 0   |
| POGZIV | 7.687 | -54 | Inv    | 0 1 2   |
| TOMVOH | 7.884 | -61 | x,y,-z | ½, 0, ½ |
| RAGDEL | 7.676 | -49 | Inv    | 1 0 1   |
|        | 7.791 | -50 | Inv    | 0 0 1   |
| GORVIU | 7.157 | -72 | Inv    | 1 0 0   |
|        | 7.241 | -63 | Inv    | 2 0 0   |
| GORVUG | 7.051 | -80 | Inv    | 1 0 1   |
|        | 7.231 | -81 | Inv    | 1 0 2   |

**offset**

|        |       |     |     |       |
|--------|-------|-----|-----|-------|
| RAGCIO | 7.403 | -71 | Ty  |       |
| RAGDOV | 7.538 | -77 | Inv | 0 1 1 |
|        | 7.538 | -77 | Inv | 0 1 2 |

**Table S5.** Extended motifs in the packing of rubrenes. Contacts with highest molecule-molecule contact energies.

Codes: SC7 (O): slipped cofacial at 7 Å distance; Operator = T, I, S

T7 =  $\approx 7$  Å translation, T9 =  $\approx 9$  Å translation; I = inversion, T = translation, S = screw, G = glide

4S: four identical screw operations, 2S: two screw related molecules

**refcode Z SC motif**

**P-1 space groups**

|          |   |        |
|----------|---|--------|
| CIYNAB01 | 1 | SC7(T) |
| GORVUG   | 2 | SC7(I) |
| QQQCIG14 | 1 | SC7(T) |
| RAGDEL   | 2 | SC7(I) |
| VICHAT   | 1 | SC7(T) |

**C2/c space group Z'=1/2**

|        |   |        |
|--------|---|--------|
| RAGCUA | 4 | SC7(T) |
| RAGDOV | 4 | SC7(I) |

**Others**

|          |   |        |       |
|----------|---|--------|-------|
| GORVIU01 | 4 | SC7(I) | P21/c |
| TOMVOH   | 8 | SC7(S) | Pbca  |

|          |   |                 |       |
|----------|---|-----------------|-------|
| CIYNAB   | 2 | SC7(T) T7+4S    | P21/c |
| CIYXUF   | 2 | SC7(T) T7+4S    | P21/c |
| CIYYAM   | 2 | SC7(T) T7+4S    | P21/c |
| PIXPUJ01 | 2 | SC7(T) T7+4S    | P21/c |
| PIFHIW   | 4 | SC7(T) T7+4S    | Pnma  |
| QQQCIG05 | 4 | SC7(T) T7+4S    | Cmca  |
| MIVDOM   | 4 | SC7(T) T7+2S+2S | Pbcm  |
| MIVDUS   | 4 | SC7(T) T7+2S+2S | Pnma  |

**Other fourfold cage coordinations (no SC)**

|          |   |          |       |
|----------|---|----------|-------|
| AXIDER   | 2 | T9+4S    | P21/c |
| INELUK02 | 2 | T9+4S    | P21/c |
| QQQCIG13 | 2 | T9+4S    | P21/c |
| PIXPOD01 | 4 | T9+2S+2S | P21/c |
| MIVDAY   | 2 | T9+2S+2S | P21   |
| RAGDAH   | 4 | T9+2S+2S | P21/n |
| PIFHOC   | 4 | T9+2G+2G | P21/c |

**Approximate or no classification**

|        |   |                |       |
|--------|---|----------------|-------|
| INELUK | 4 | 2I+2S+2T       | P21/n |
| MIVDEC | 4 | mix G, S       | Pna21 |
| RAGCEK | 4 | mix T, I, G    | P21/c |
| RAGCIO | 4 | T7+4G (no SC)  | P2/c  |
| TEFDUG | 4 | T7+4G (no SC)  | Pnna  |
| TOMWAU | 4 | mix T, I, S, G | P21/n |

Z' > 1: MIVCUR, POGZIV, RAGDIP not analyzed

**Table S6.** Surface energies (erg cm<sup>-2</sup>) for selected isomorphous monoclinic rubrenes.

|                 | <b>CIYNAB</b>  | <b>CIYXUF</b> | <b>CIYYAM</b> | <b>PIXPUJ01</b> |
|-----------------|----------------|---------------|---------------|-----------------|
| Form            | Surface energy |               |               |                 |
| {100}           | 102.5          | 54.5          | 105.2         | 86.4            |
| {10 $\bar{2}$ } | 86.1           | 78.5          | 86.3          | 89.9            |
| {011}           | 107.8          | 89.0          | 103.3         | 88.4            |
| {002}           | 86.3           | 79.4          | 85.3          | 92.8            |
| {11 $\bar{1}$ } | 93.7           | 80.6          | 90.5          | 103.0           |
